# Supplementary material
Source: PubMed Central journal article supplement (PMC7212398)

## WEB MATERIAL

### **Associations of High-Sensitivity Cardiac Troponin and Natriuretic Peptide With Subsequent Risk of Infection in Persons Without Cardiovascular Disease: The Atherosclerosis Risk in Communities Study**

Junichi Ishigami, Ron C. Hoogeveen, Christie M. Ballantyne, Aaron R. Folsom, Josef Coresh, Elizabeth Selvin, and Kunihiro Matsushita

Correspondence to Dr. Kunihiro Matsushita, Department of Epidemiology, Johns Hopkins Bloomberg School of Public Health, Welch Center for Prevention, Epidemiology, and Clinical Research, 2024 E. Monument St., Suite 2-600, Baltimore, MD 21287 (e-mail: [kmatsush@jhsph.edu](mailto:kmatsush@jhsph.edu))

#### **Table of Contents**

|                                                                                                                                                                                                                                     |   |
|-------------------------------------------------------------------------------------------------------------------------------------------------------------------------------------------------------------------------------------|---|
| <b>Web Table 1:</b> List of ICD-9 codes and corresponding diagnosis.....                                                                                                                                                            | 2 |
| <b>Web Table 2:</b> Adjusted hazard ratios of hospitalization with infection accounting for incident CVD among participants without prevalent CVD .....                                                                             | 4 |
| <b>Web Table 3:</b> Crude incidence rates and adjusted hazard ratios for hospitalization with infection using a cut-off for hs-cTnT of <5 ng/L .....                                                                                | 5 |
| <b>Web Table 4:</b> Crude incidence rates and adjusted hazard ratios for hospitalization with infection restricting to 1,664 cases of primary diagnosis of infection .....                                                          | 6 |
| <b>Web Table 5:</b> Adjusted hazard ratios of hospitalization with infection in subgroups by age, sex, race, and status of diabetes and CKD .....                                                                                   | 7 |
| <b>Web Table 6:</b> Crude mortality rate and adjusted hazard ratios of infection-related deaths .....                                                                                                                               | 8 |
| <b>Web Figure 1:</b> Estimates for the cumulative incidence of hospitalization with infection accounting for death as a competing risk event stratified by (A) hs-cTnT and (B) NTproBNP categories: The ARIC Study, 1996-2013 ..... | 9 |

**Web Table 1. List of ICD-9 codes and corresponding diagnosis**

| <b>ICD-9</b>  | <b>Referred disease description</b>                         |
|---------------|-------------------------------------------------------------|
| 001–139       | Infectious and parasitic diseases                           |
| 254.1         | Abscess of thymus                                           |
| 320–326       | Diseases of the nervous system                              |
| 331.81        | Rye's syndrome                                              |
| 372–372.39    | Conjunctivitis                                              |
| 373.0–373.2   | Inflammation of eyelids (Blepharitis, Chalazion)            |
| 382–382.4     | Suppurative and unspecified otitis media                    |
| 383           | Mastoiditis                                                 |
| 386.33        | Suppurative labyrinthitis                                   |
| 386.35        | Viral labyrinthitis                                         |
| 388.6         | Otorrhea                                                    |
| 390–393       | Rheumatic Fever                                             |
| 421–421.1     | Acute and subacute endocarditis                             |
| 422           | Acute myocarditis                                           |
| 422.91–422.93 | Acute myocarditis, idiopathic                               |
| 460–466       | Acute respiratory infections                                |
| 472–474.0     | Chronic pharyngitis and nasopharyngitis                     |
| 475–476.1     | Peritonsillar abscess                                       |
| 478.21–478.24 | Other diseases of upper respiratory tract                   |
| 478.29        | Other diseases of upper respiratory tract                   |
| 480–486       | Pneumonia                                                   |
| 490           | Bronchitis, not specified as acute or chronic               |
| 491.1         | Mucopurulent chronic bronchitis                             |
| 494           | Bronchiectasis                                              |
| 510           | Empyema                                                     |
| 511           | Pleurisy                                                    |
| 513           | Abscess of lung and mediastinum                             |
| 518.6         | Allergic bronchopulmonary aspergillosis                     |
| 519.01        | Infection of tracheostomy stoma                             |
| 522.5         | Periapical abscess without sinus                            |
| 522.7         | Periapical abscess with sinus                               |
| 527.3         | Abscess of salivary gland                                   |
| 528.3         | Cellulitis and abscess of oral soft tissues                 |
| 540–542       | Appendicitis                                                |
| 566–567.9     | Abscess of anal and rectal regions                          |
| 569.5         | Abscess of intestine                                        |
| 572–572.1     | Liver abscess and sequelae of chronic liver disease         |
| 573.1–573.3   | Hepatitis, toxic                                            |
| 575–575.12    | Other disorders of gallbladder                              |
| 590–590.9     | Infections of kidney                                        |
| 595–595.4     | Cystitis                                                    |
| 597–597.89    | Urethritis, not sexually transmitted, and urethral syndrome |
| 598           | Stricture, urethral, unspecified infection                  |
| 599           | Urinary tract infection, unspecified/pyuria                 |
| 601–601.9     | Inflammatory diseases of prostate                           |
| 604–604.9     | Orchitis and epididymitis                                   |
| 607.1         | Balanitis                                                   |

|               |                                                                                         |
|---------------|-----------------------------------------------------------------------------------------|
| 607.2         | Other inflammatory disorders of penis                                                   |
| 608           | Seminal vesiculitis                                                                     |
| 608.4         | Other inflammatory disorders of male genital organs                                     |
| 611           | Inflammatory disease of breast                                                          |
| 614–616.1     | Inflammatory disease of ovary fallopian tube pelvic cellular tissue and peritoneum      |
| 616.3–616.4   | Abscess of Bartholin's gland, Other abscess of vulva                                    |
| 616.8         | Other specified inflammatory diseases of cervix vagina and vulva                        |
| 670           | Major puerperal infection                                                               |
| 680–686.9     | Infections of skin and subcutaneous tissue                                              |
| 706           | Acne varioliformis                                                                      |
| 711–711.9     | Arthropathy associated with infections                                                  |
| 730–730.3     | Osteomyelitis, periostitis, and other infections involving bone                         |
| 730.8–730.9   | Osteomyelitis, periostitis, and other infections involving bone                         |
| 790.7         | Bacteremia (not septicemia)                                                             |
| 790.8         | Viremia, unspecified                                                                    |
| 996.60–996.69 | Infection and inflammatory reaction due to internal prosthetic device implant and graft |
| 997.62        | Infection of amputation stump, unspecified extremity                                    |
| 998.5         | Postoperative infection not elsewhere classified                                        |
| 999.3.        | Other infection due to medical care not elsewhere classified                            |

\*The definitions of infection-related ICD-9 codes were based on the analytical methods used in United States Renal Data System (USRDS). Details are available at the USRDS website ([http://www.usrds.org/2014/view/v2\\_00\\_appx.aspx](http://www.usrds.org/2014/view/v2_00_appx.aspx).)

**Web Table 2. Adjusted hazard ratios of hospitalization with infection accounting for incident CVD among participants without prevalent CVD**

|                         | Adjusted hazard ratio (95%CI) |                                                        |                                                      |
|-------------------------|-------------------------------|--------------------------------------------------------|------------------------------------------------------|
|                         | Censored for incident CVD     | Sub-hazard model with incident CVD as a competing risk | Adjusted for incident CVD as a time-varying variable |
| <b>hs-cTnT (ng/L)</b>   |                               |                                                        |                                                      |
| Categorical             |                               |                                                        |                                                      |
| < 3                     | 1 [Reference]                 | 1 [Reference]                                          | 1 [Reference]                                        |
| 4-5                     | 1.08 (0.97, 1.20)             | 1.09 (0.98, 1.21)                                      | 1.10 (1.00, 1.22)                                    |
| 6-8                     | 1.13 (1.01, 1.26)             | 1.12 (1.01, 1.26)                                      | 1.13 (1.02, 1.25)                                    |
| 9-13                    | 1.31 (1.15, 1.49)             | 1.26 (1.11, 1.44)                                      | 1.23 (1.09, 1.39)                                    |
| ≥ 14                    | 1.47 (1.24, 1.75)             | 1.32 (1.10, 1.59)                                      | 1.39 (1.19, 1.62)                                    |
| Continuous              |                               |                                                        |                                                      |
| Per log(hs-cTnT)        | 1.23 (1.14, 1.32)             | 1.16 (1.07, 1.25)                                      | 1.17 (1.10, 1.26)                                    |
| <b>NTproBNP (pg/mL)</b> |                               |                                                        |                                                      |
| Categorical             |                               |                                                        |                                                      |
| < 48.1                  | 1 [Reference]                 | 1 [Reference]                                          | 1 [Reference]                                        |
| 48.1-80.1               | 1.07 (0.97, 1.19)             | 1.07 (0.96, 1.19)                                      | 1.01 (0.91, 1.12)                                    |
| 80.2-137.2              | 1.19 (1.07, 1.33)             | 1.15 (1.03, 1.28)                                      | 1.08 (0.98, 1.19)                                    |
| 137.2-248.0             | 1.20 (1.05, 1.36)             | 1.12 (0.98, 1.28)                                      | 1.10 (0.97, 1.24)                                    |
| ≥ 248.1                 | 1.59 (1.35, 1.87)             | 1.26 (1.06, 1.51)                                      | 1.37 (1.18, 1.59)                                    |
| Continuous              |                               |                                                        |                                                      |
| Per log(NTproBNP)       | 1.09 (1.05, 1.14)             | 1.04 (1.00, 1.08)                                      | 1.04 (1.01, 1.08)                                    |

Abbreviations: CVD, cardiovascular disease, hs-cTnT, high sensitivity cardiac troponin T; NTproBNP, N-terminal pro B-type natriuretic peptide.

**Web Table 3. Crude incidence rates and adjusted hazard ratios for hospitalization with infection using a cut-off for hs-cTnT of <5 ng/L**

| hs-cTnT category (ng/L) | n    | Events, n | Incidence rate per<br>1,000 person-y (95% CI) | Adjusted hazard ratio<br>(95% CI) |
|-------------------------|------|-----------|-----------------------------------------------|-----------------------------------|
| < 5                     | 4302 | 1442      | 24.8 (23.5, 26.1)                             | 1 [Reference]                     |
| 5-8                     | 2503 | 1002      | 31.8 (29.9, 33.8)                             | 1.13 (1.04, 1.24)                 |
| 9-13                    | 1028 | 480       | 40.3 (36.9, 44.1)                             | 1.27 (1.13, 1.42)                 |
| ≥ 14                    | 504  | 263       | 52.8 (46.8, 59.6)                             | 1.46 (1.26, 1.70)                 |

Abbreviations: CVD, cardiovascular disease, hs-cTnT, high sensitivity cardiac troponin T; NTproBNP, N-terminal pro B-type natriuretic peptide.

**Web Table 4. Crude incidence rates and adjusted hazard ratios for hospitalization with infection restricting to 1,664 cases of primary diagnosis of infection**

|                                   | n     | Events, n | Incidence rate per<br>1,000 person-y (95% CI) | Adjusted hazard ratio<br>(95% CI) |
|-----------------------------------|-------|-----------|-----------------------------------------------|-----------------------------------|
| Overall sample                    |       |           |                                               |                                   |
| Without prevalent CVD at baseline | 8,337 | 1398      | 12.0 (11.4, 12.6)                             | 1 [Reference]                     |
| Prevalent CVD at baseline         | 1,066 | 266       | 21.3 (18.9, 24.1)                             | 1.28 (1.11, 1.49)                 |
| <hr/>                             |       |           |                                               |                                   |
| Without prevalent CVD at baseline |       |           |                                               |                                   |
| hs-cTnT (ng/L)                    |       |           |                                               |                                   |
| Categorical                       |       |           |                                               |                                   |
| < 3                               | 3,401 | 460       | 9.2 (8.4, 10.1)                               | 1 [Reference]                     |
| 4-5                               | 1,717 | 252       | 10.2 (9.0, 11.5)                              | 1.01 (0.86, 1.18)                 |
| 6-8                               | 1,687 | 328       | 14.2 (12.8, 15.9)                             | 1.33 (1.14, 1.54)                 |
| 9-13                              | 1,028 | 225       | 16.9 (14.9, 19.3)                             | 1.37 (1.15, 1.63)                 |
| ≥ 14                              | 504   | 133       | 23.3 (19.7, 27.7)                             | 1.69 (1.35, 2.12)                 |
| Continuous                        |       |           |                                               |                                   |
| Per log(hs-cTnT)                  |       |           |                                               | 1.30 (1.17, 1.44)                 |
| NTproBNP (pg/mL)                  |       |           |                                               |                                   |
| Categorical                       |       |           |                                               |                                   |
| < 48.1                            | 3,378 | 479       | 9.8 (8.9, 10.7)                               | 1 [Reference]                     |
| 48.1-80.1                         | 1,712 | 266       | 10.9 (9.7, 12.3)                              | 1.07 (0.92, 1.24)                 |
| 80.2-137.1                        | 1,691 | 301       | 12.8 (11.4, 14.3)                             | 1.23 (1.06, 1.43)                 |
| 137.2-248.0                       | 1,034 | 214       | 15.5 (13.5, 17.7)                             | 1.38 (1.16, 1.64)                 |
| ≥ 248.1                           | 522   | 138       | 22.4 (19.0, 26.5)                             | 1.74 (1.41, 2.14)                 |
| Continuous                        |       |           |                                               |                                   |
| Per log(NTproBNP)                 |       |           |                                               | 1.14 (1.08, 1.20)                 |

Abbreviations: CVD, cardiovascular disease, hs-cTnT, high sensitivity cardiac troponin T; NTproBNP, N-terminal pro B-type natriuretic peptide.

**Web Table 5. Adjusted hazard ratios of hospitalization with infection in subgroups by age, sex, race, and status of diabetes and CKD**

| Subgroup |                  | No. of subjects | Participants without prevalent CVD at baseline (n=8,435) |               |                                              |               |
|----------|------------------|-----------------|----------------------------------------------------------|---------------|----------------------------------------------|---------------|
|          |                  |                 | hs-cTnT<br>per log(hs-cTnT)<br>HR (95% CI)               | p-interaction | NTproBNP<br>per log(NTproBNP)<br>HR (95% CI) | p-interaction |
| Age, y   | <65              | 5,325           | 1.29 (1.18, 1.42)                                        | 0.32          | 1.11 (1.06, 1.16)                            | 0.14          |
|          | ≥65              | 3,012           | 1.34 (1.22, 1.47)                                        |               | 1.18 (1.12, 1.25)                            |               |
| Sex      | Male             | 3,445           | 1.35 (1.23, 1.47)                                        | 0.87          | 1.11 (1.06, 1.17)                            | 0.15          |
|          | Female           | 4,892           | 1.29 (1.17, 1.41)                                        |               | 1.17 (1.11, 1.24)                            |               |
| Race     | White            | 6,483           | 1.28 (1.19, 1.38)                                        | 0.33          | 1.17 (1.12, 1.22)                            | 0.12          |
|          | African-American | 1,854           | 1.39 (1.21, 1.60)                                        |               | 1.06 (0.99, 1.13)                            |               |
| Diabetes | No               | 7,144           | 1.31 (1.22, 1.42)                                        | 0.14          | 1.13 (1.09, 1.18)                            | 0.90          |
|          | Yes              | 1,193           | 1.30 (1.14, 1.47)                                        |               | 1.15 (1.06, 1.24)                            |               |
| CKD      | No               | 7,443           | 1.28 (1.18, 1.38)                                        | 0.31          | 1.13 (1.09, 1.18)                            | 0.87          |
|          | Yes              | 894             | 1.41 (1.23, 1.63)                                        |               | 1.14 (1.05, 1.25)                            |               |

\*CKD was defined as estimated glomerular filtration <60 ml/min/1.73m<sup>2</sup> or urinary albumin-to-creatinine ratio ≥30 mg/g.

Abbreviations: CKD, chronic kidney disease; CVD, cardiovascular disease, hs-cTnT, high sensitivity cardiac troponin T; NTproBNP, N-terminal pro B-type natriuretic peptide.

**Web Table 6. Crude mortality rate and adjusted hazard ratios of infection-related deaths**

|                                   | n     | Events, n | Mortality rate per<br>1,000 person-y (95% CI) | Adjusted hazard<br>ratio (95% CI) |
|-----------------------------------|-------|-----------|-----------------------------------------------|-----------------------------------|
| Overall sample                    |       |           |                                               |                                   |
| Without prevalent CVD at baseline | 8,337 | 523       | 4.2 (3.9, 4.6)                                | 1 [Reference]                     |
| Prevalent CVD at baseline         | 1,066 | 143       | 10.6 (9.0, 12.5)                              | 1.57 (1.27, 1.93)                 |
| <hr/>                             |       |           |                                               |                                   |
| Without prevalent CVD at baseline |       |           |                                               |                                   |
| hs-cTnT (ng/L)                    |       |           |                                               |                                   |
| Categorical                       |       |           |                                               |                                   |
| < 3                               | 3,401 | 132       | 2.5 (2.1, 3.0)                                | 1 [Reference]                     |
| 4-5                               | 1,717 | 95        | 3.7 (3.0, 4.5)                                | 1.17 (0.89, 1.53)                 |
| 6-8                               | 1,687 | 133       | 5.4 (4.6, 6.4)                                | 1.53 (1.19, 1.98)                 |
| 9-13                              | 1,028 | 96        | 6.7 (5.5, 8.2)                                | 1.46 (1.09, 1.95)                 |
| ≥ 14                              | 504   | 67        | 10.6 (8.4, 13.5)                              | 1.91 (1.34, 2.71)                 |
| Continuous                        |       |           |                                               |                                   |
| Per log(hs-cTnT)                  |       |           |                                               | 1.38 (1.18, 1.61)                 |
| NTproBNP (pg/mL)                  |       |           |                                               |                                   |
| Categorical                       |       |           |                                               |                                   |
| < 48.1                            | 3,378 | 160       | 3.1 (2.7, 3.6)                                | 1 [Reference]                     |
| 48.1-80.1                         | 1,712 | 95        | 3.7 (3.0, 4.6)                                | 1.14 (0.88, 1.48)                 |
| 80.2-137.1                        | 1,691 | 116       | 4.7 (3.9, 5.6)                                | 1.38 (1.07, 1.77)                 |
| 137.2-248.0                       | 1,034 | 82        | 5.6 (4.5, 6.9)                                | 1.42 (1.07, 1.89)                 |
| ≥ 248.1                           | 522   | 70        | 10.4 (8.2, 13.1)                              | 2.14 (1.55, 2.94)                 |
| Continuous                        |       |           |                                               |                                   |
| Per log(NTproBNP)                 |       |           |                                               | 1.23 (1.13, 1.35)                 |

\*The model was adjusted for age, sex, race, body mass index, smoking status, alcohol consumption, years of education, physical inability, high sensitivity C-reactive protein, status of CKD, medication use of aspirin, anticoagulant, and statin, and medical history of hypertension, diabetes, cancer, and chronic obstructive pulmonary disease.

Abbreviations: CVD, cardiovascular disease, hs-cTnT, high sensitivity cardiac troponin T; NTproBNP, N-terminal pro B-type natriuretic peptide.



**Web Figure 1. Estimates for the cumulative incidence of hospitalization with infection accounting for death as a competing risk event stratified by (A) hs-cTnT and (B) NTproBNP categories: The ARIC Study, 1996-2013**

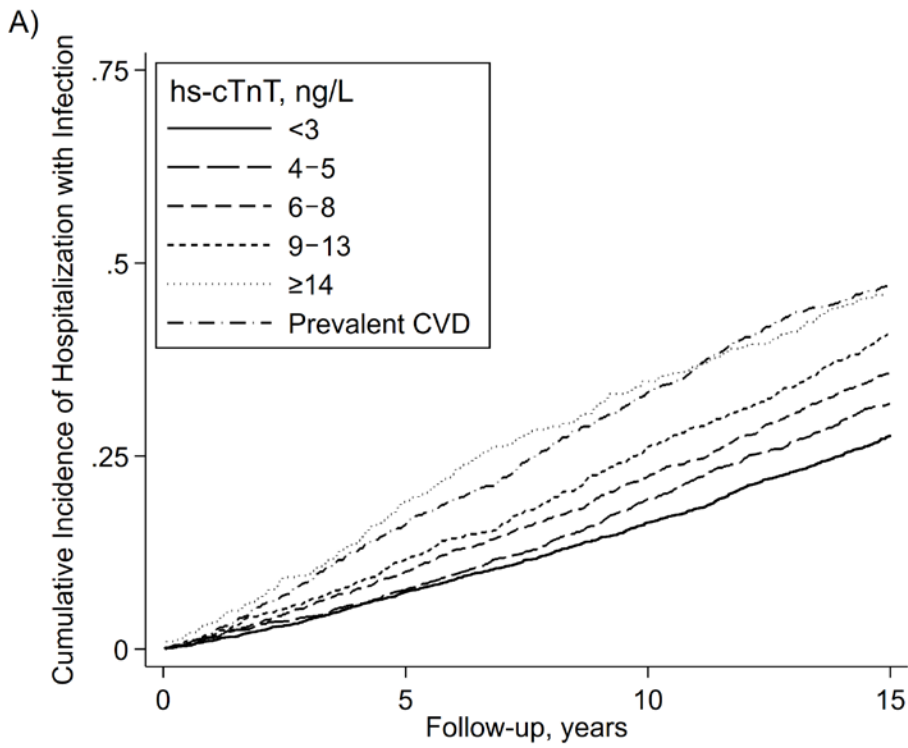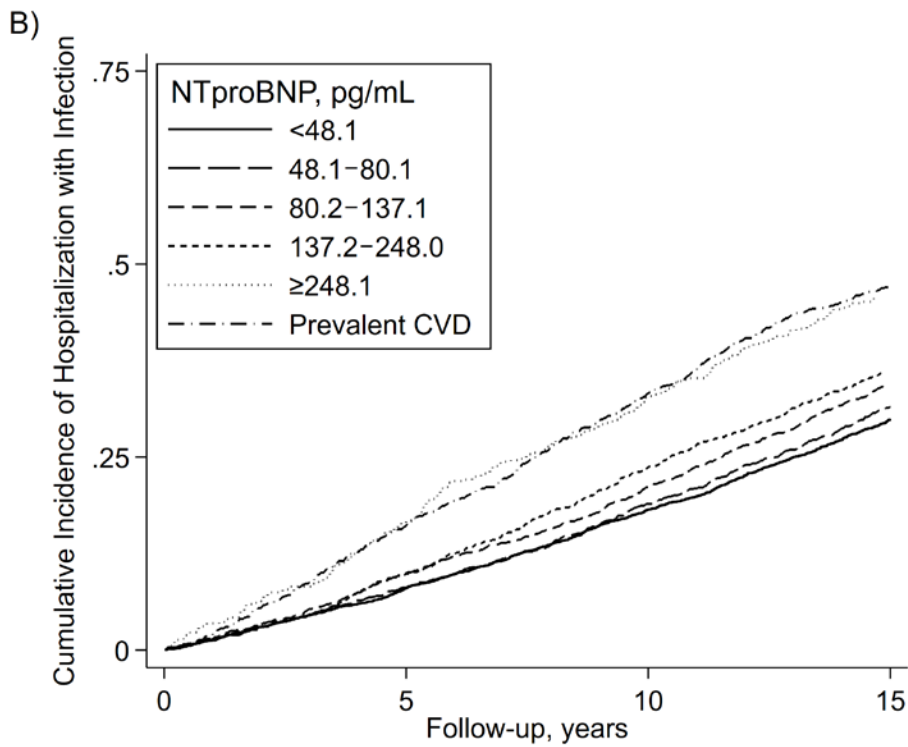

Supplement: ishigami_web_material_final_kwz113.pdf [file ishigami_web_material_final_kwz113.pdf]
